this issue as part of our study, but we felt that the work of Liu *et al.*<sup>2</sup> had already answered this question definitively.

**John F. Boylan, M.B., F.R.C.P.C.**

Staff Anaesthetist

St. Vincent's University Hospital

Dublin 4, Ireland

**Alan N. Sandler, M.B., F.R.C.P.C.**

Anaesthetist-in-Chief

University Health Network and Mount Sinai Hospital

Professor of Anaesthesia

University of Toronto

Toronto, Canada M5G 2C4

Anesthesiology

1999; 91:318

© 1999 American Society of Anesthesiologists, Inc.

Lippincott Williams & Wilkins, Inc.

## Pretreatment Intravenous Lidocaine for Intubation of the Asthmatic Patient: More Data Are Needed

*To the Editor:*—Important issues regarding the use of lidocaine as a pretreatment agent before intubation in patients with reactive airway disease remain unresolved. In the October 1998 issue of ANESTHESIOLOGY, the use of intravenous lidocaine was recommended to attenuate airway reflexes in patients with bronchial hyperreactivity.<sup>1</sup> This recommendation is based on the finding that lidocaine attenuates reflex bronchoconstriction caused by inhaled histamine. Furthermore, the authors reported no significant change in mean values of forced expiratory volume in 1 s at baseline and after lidocaine administration.

I remain unconvinced that intravenous lidocaine is a safe and effective agent in patients with reactive airway disease. Multiple studies have demonstrated an acute bronchoconstrictor effect by inhaled lidocaine.<sup>2-4</sup> The ability of lidocaine to attenuate histamine-induced bronchoconstriction does not refute the concern that lidocaine may precipitate small airway bronchoconstriction in patients with reactive airway disease. McAlpine and Thomson<sup>2</sup> found no correlation between asthmatic subjects with histamine airway hyperresponsiveness and those who suffered bronchoconstriction produced by inhaled lidocaine. In addition, changes in expiratory flow rates after inhaled lidocaine demonstrate much intersubject variability; use of mean number values can overlook this important intersubject variability. Prakash *et al.*<sup>3</sup> reported that 3 of 15 stable asthmatic subjects experienced a  $\geq 10\%$  decrease in maximum midexpiratory flow, and 1 of 15 subjects experienced a  $\geq 10\%$  increase in maximum midexpiratory flow. McAlpine and Thomson<sup>2</sup> reported that maximum percent change in forced expiratory volume in one s among stable asthmatic subjects after inhaled lidocaine varied from  $-42.1$  to  $+28.2$ . Thus, I am skeptical that attenuation of a marker of bronchial reactivity, such as a histamine

## References

1. Dahl JB, Rosenberg J, Hansen BL, Hjortso NC, Kehlet H: Differential analgesic effects of low-dose epidural morphine and morphine-bupivacaine at rest and during mobilization after major abdominal surgery. *Anesth Analg* 1992; 74:362-5
2. Liu SS, Carpenter RL, Mackey DC, Thirby RC, Rupp SM, Shine TSJ, Feinglass NG, Metzger PP, Fulmer JT, Smith SL: Effects of perioperative analgesic technique on rate of recovery after colon surgery. *ANESTHESIOLOGY* 1996; 83:757-65

(Accepted for publication February 1, 1999.)

challenge, is adequate data to support a recommendation of intravenous lidocaine use in patients with reactive airway disease. Intravenous lidocaine efficacy should be demonstrated in a general population of asthmatic patients, not just a subpopulation that demonstrates hyper-reactive responsiveness to histamine, and data presentation should address possible intersubject variability.

**R. Ben Zemenick, D.O.**

Department of Emergency Medicine

St. Paul Medical Center

Dallas, Texas 75235

bzemenick@pol.net

## References

1. Groeben H, Sivanus M-T, Beste M, Peters J: Combined intravenous lidocaine and inhaled salbutamol protect against bronchial hyperreactivity more effectively than lidocaine or salbutamol alone. *ANESTHESIOLOGY* 1998; 89:862-8
2. McAlpine LG, Thomson NC: Lidocaine-induced bronchoconstriction in asthmatic patients. *Chest* 1989; 96:1012-5
3. Prakash GS, Sharma SK, Pande JN: Effect of 4% lidocaine inhalation in bronchial asthma. *J Asthma* 1990; 27:81-5
4. Miller WC, Awe R: Effect of nebulized lidocaine on reactive airways. *Am Rev Respir Dis* 1975; 111:739-41

(Accepted for publication February 18, 1999.)
